# Supplementary material
Source: publisher site journal article supplement (https://content.cld.iop.org/journals/1945-7111/162/10/C515/revision1/16208_2_supp_0_nrj696.pdf)
Supplement: Supplementary file 1 [file 16208_2_supp_0_nrj696.pdf]

1 =====README.TXT=====

2 ===

3

4 SUPPLEMENTARY MATERIAL NOTICE

5

6 ARTICLE INFORMATION

7

8 Journal: ECS Journal of the Electrochemical Society

9

10

11 All Authors: F. Varela, M. YJ. Tan, and M. Forsyth

12 Title: Electrochemical Method for Studying Localized Corrosion beneath

13 Disbonded Coatings under Cathodic Protection

14

15 CONTACT INFORMATION

16

17 F. Varela

18 Deakin University

19 Institute for Frontier Materials

20 75 Pigdons Road

21 Waurin Ponds, Victoria 3216

22 Australia

23 60 4 7882 5101

24 61 3 5227 2167 (fax)

25 fvarela@deakin.edu.au

26

27

28 INFORMATION FROM THE PUBLISHER

29

30 ECS is not responsible for the content of electronically deposited

31 supplemental material and will not provide support for its use.

32 ECS assumes no liability for the possible contamination

33 by electronic "viruses" of the material deposited. Problems with

34 file content should be directed to the contact author listed above.

35 ECS has been granted a license to publish the material. Requests to

36 reproduce any of the supplemental material must be directed to the

37 contact author listed above.
